# Supplementary material for: A biosensor for the direct visualization of auxin
Source: PubMed Central journal article supplement (PMC8081663; doi:10.1038/s41586-021-03425-2), 2021-04-07
Supplement: 41586_2021_3425_MOESM1_ESM.pdf [file 41586_2021_3425_MOESM1_ESM.pdf]

---

**Supplementary information**

---

**A biosensor for the direct visualization of auxin**

---

In the format provided by the authors and unedited

## SI Guide

### A biosensor for direct visualisation of auxin

Ole Herud-Sikimić<sup>1\*</sup>, Andre C. Stiel<sup>1,2\*</sup>, Martina Kolb<sup>1\*</sup>, Sooruban Shanmugaratnam<sup>1,3</sup>,  
Kenneth W. Berendzen<sup>4</sup>, Christian Feldhaus<sup>1</sup>, Birte Höcker<sup>1,3^</sup>, Gerd Jürgens<sup>1^</sup>

#### Suppl. Table S1.

**Table S1a.** Data collection and refinement statistics (molecular replacement) for TrpR-Wt with ligand IAA

**Table S1b.** Data collection and refinement statistics (molecular replacement) for TrpR-S88Y with ligand IAA

**Table S1c.** Data collection and refinement statistics (molecular replacement) for TrpR-T44L-S88Y with ligand IAA

**Table S1d.** Data collection and refinement statistics (molecular replacement) for TrpR-T44L-T81M-S88Y with ligand IAA

**Table S1e.** Data collection and refinement statistics (molecular replacement) for TrpR-T44L-T81M-N87G-S88Y with ligand IAA

**Table S1f.** Data collection and refinement statistics (molecular replacement) for TrpR-M42F-T44L-T81M-N87G-S88Y with ligand IAA

**Table S1g.** Data collection and refinement statistics (molecular replacement) for TrpR-M42F-T44L-T81I-S88Y with ligand IAA

**Table S1h.** Data collection and refinement statistics (molecular replacement) for TrpR-M42F-T44L-T81I-S88Y with ligand IAN

#### Suppl. Table S2.

**Table S2.** Flow cytometry statistics

**Table S1a** Data collection and refinement statistics (molecular replacement) for TrpR-Wt with ligand IAA

| TrpR-Wt IAA: 6EJW                                    |                                         |
|------------------------------------------------------|-----------------------------------------|
| <b>Data collection</b>                               |                                         |
| Space group                                          | P 4 <sub>3</sub>                        |
| Cell dimensions                                      |                                         |
| <i>a</i> , <i>b</i> , <i>c</i> (Å)                   | 81.31 81.31 72.00                       |
| $\alpha$ , $\beta$ , $\gamma$ (°)                    | 90 90 90                                |
| Resolution (Å)                                       | 44.93 - 1.99 (2.06 - 1.99) <sup>a</sup> |
| <i>R</i> <sub>sym</sub> or <i>R</i> <sub>merge</sub> | 0.094 (1.962)                           |
| <i>I</i> / $\sigma$ <i>I</i>                         | 11.55 (0.91)                            |
| Completeness (%)                                     | 99.45 (96.48)                           |
| Redundancy                                           | 6.5 (6.0)                               |
| <b>Refinement</b>                                    |                                         |
| Resolution (Å)                                       | 44.93 - 1.99 (2.06 - 1.99)              |
| No. reflections                                      | 32088 (3099)                            |
| <i>R</i> <sub>work</sub> / <i>R</i> <sub>free</sub>  | 0.195 (0.309) / 0.243 (0.364)           |
| No. atoms                                            |                                         |
| Protein                                              | 3293                                    |
| Ligand/ion                                           | 130                                     |
| Water                                                | 130                                     |
| <i>B</i> -factors                                    |                                         |
| Protein                                              | 50.2                                    |
| Ligand/ion                                           | 46.4                                    |
| Water                                                | 51.5                                    |
| R.m.s. deviations                                    |                                         |
| Bond lengths (Å)                                     | 0.008                                   |
| Bond angles (°)                                      | 0.90                                    |

<sup>a</sup> Numbers in brackets correspond to values in the highest resolution shell.

**Table S1b** Data collection and refinement statistics (molecular replacement) for TrpR-S88Y with ligand IAA

| TrpR-S88Y IAA: 6EJZ                                  |                                         |
|------------------------------------------------------|-----------------------------------------|
| <b>Data collection</b>                               |                                         |
| Space group                                          | P 4 <sub>3</sub>                        |
| Cell dimensions                                      |                                         |
| <i>a</i> , <i>b</i> , <i>c</i> (Å)                   | 82.44 82.44 75.65                       |
| $\alpha$ , $\beta$ , $\gamma$ (°)                    | 90 90 90                                |
| Resolution (Å)                                       | 41.22 - 1.90 (1.97 - 1.90) <sup>a</sup> |
| <i>R</i> <sub>sym</sub> or <i>R</i> <sub>merge</sub> | 0.081 (1.816)                           |
| <i>I</i> / $\sigma$ <i>I</i>                         | 20.28 (1.47)                            |
| Completeness (%)                                     | 99.79 (98.67)                           |
| Redundancy                                           | 12.8 (12.6)                             |
| <b>Refinement</b>                                    |                                         |
| Resolution (Å)                                       | 41.22 - 1.90 (1.97 - 1.90)              |
| No. reflections                                      | 40085 (3931)                            |
| <i>R</i> <sub>work</sub> / <i>R</i> <sub>free</sub>  | 0.184 (0.305) / 0.218 (0.337)           |
| No. atoms                                            |                                         |
| Protein                                              | 3337                                    |
| Ligand/ion                                           | 118                                     |
| Water                                                | 220                                     |
| <i>B</i> -factors                                    |                                         |
| Protein                                              | 43.8                                    |
| Ligand/ion                                           | 49.4                                    |
| Water                                                | 46.8                                    |
| R.m.s. deviations                                    |                                         |
| Bond lengths (Å)                                     | 0.006                                   |
| Bond angles (°)                                      | 0.69                                    |

<sup>a</sup> Numbers in brackets correspond to values in the highest resolution shell.

**Table S1c** Data collection and refinement statistics (molecular replacement) for TrpR-T44L-S88Y with ligand IAA

| TrpR-T44L-S88Y IAA: 6ENI                             |                                                |
|------------------------------------------------------|------------------------------------------------|
| <b>Data collection</b>                               |                                                |
| Space group                                          | P 2 <sub>1</sub> 2 <sub>1</sub> 2 <sub>1</sub> |
| Cell dimensions                                      |                                                |
| <i>a</i> , <i>b</i> , <i>c</i> (Å)                   | 54.78 63.41 64.77                              |
| $\alpha$ , $\beta$ , $\gamma$ (°)                    | 90 90 90                                       |
| Resolution (Å)                                       | 34.91 - 1.10 (1.14 - 1.10) <sup>a</sup>        |
| <i>R</i> <sub>sym</sub> or <i>R</i> <sub>merge</sub> | 0.052 (0.701)                                  |
| <i>I</i> / $\sigma$ <i>I</i>                         | 26.67 (3.85)                                   |
| Completeness (%)                                     | 94.44 (80.40)                                  |
| Redundancy                                           | 12.7 (11.4)                                    |
| <b>Refinement</b>                                    |                                                |
| Resolution (Å)                                       | 34.91 - 1.10 (1.14 - 1.10)                     |
| No. reflections                                      | 87117 (7337)                                   |
| <i>R</i> <sub>work</sub> / <i>R</i> <sub>free</sub>  | 0.158 (0.263) / 0.176 (0.263)                  |
| No. atoms                                            |                                                |
| Protein                                              | 1805                                           |
| Ligand/ion                                           | 30                                             |
| Water                                                | 469                                            |
| <i>B</i> -factors                                    |                                                |
| Protein                                              | 14.1                                           |
| Ligand/ion                                           | 13.1                                           |
| Water                                                | 23.7                                           |
| R.m.s. deviations                                    |                                                |
| Bond lengths (Å)                                     | 0.010                                          |
| Bond angles (°)                                      | 1.08                                           |

<sup>a</sup> Numbers in brackets correspond to values in the highest resolution shell.

**Table S1d** Data collection and refinement statistics (molecular replacement) for TrpR-T44L-T81M-S88Y with ligand IAA

| TrpR-T44L-T81M-S88Y IAA: 6EKP                        |                                                |
|------------------------------------------------------|------------------------------------------------|
| <b>Data collection</b>                               |                                                |
| Space group                                          | P 2 <sub>1</sub> 2 <sub>1</sub> 2 <sub>1</sub> |
| Cell dimensions                                      |                                                |
| <i>a</i> , <i>b</i> , <i>c</i> (Å)                   | 55.04 63.12 64.64                              |
| $\alpha$ , $\beta$ , $\gamma$ (°)                    | 90 90 90                                       |
| Resolution (Å)                                       | 41.48 - 1.46 (1.51 - 1.46) <sup>a</sup>        |
| <i>R</i> <sub>sym</sub> or <i>R</i> <sub>merge</sub> | 0.034 (0.770)                                  |
| <i>I</i> / $\sigma$ <i>I</i>                         | 20.30 (1.97)                                   |
| Completeness (%)                                     | 98.54 (94.76)                                  |
| Redundancy                                           | 4.3 (4.2)                                      |
| <b>Refinement</b>                                    |                                                |
| Resolution (Å)                                       | 41.48 - 1.46 (1.51 - 1.46)                     |
| No. reflections                                      | 39383 (3744)                                   |
| <i>R</i> <sub>work</sub> / <i>R</i> <sub>free</sub>  | 0.172 (0.306) / 0.190 (0.332)                  |
| No. atoms                                            |                                                |
| Protein                                              | 1689                                           |
| Ligand/ion                                           | 41                                             |
| Water                                                | 250                                            |
| <i>B</i> -factors                                    |                                                |
| Protein                                              | 35.0                                           |
| Ligand/ion                                           | 30.8                                           |
| Water                                                | 45.4                                           |
| R.m.s. deviations                                    |                                                |
| Bond lengths (Å)                                     | 0.002                                          |
| Bond angles (°)                                      | 0.50                                           |

<sup>a</sup> Numbers in brackets correspond to values in the highest resolution shell.

**Table S1e** Data collection and refinement statistics (molecular replacement) for TrpR-T44L-T81M-N87G-S88Y with ligand IAA

| TrpR-T44L-T81M-N87G-S88Y IAA: 6ENN                   |                                                |
|------------------------------------------------------|------------------------------------------------|
| <b>Data collection</b>                               |                                                |
| Space group                                          | P 2 <sub>1</sub> 2 <sub>1</sub> 2 <sub>1</sub> |
| Cell dimensions                                      |                                                |
| <i>a</i> , <i>b</i> , <i>c</i> (Å)                   | 54.58 63.19 64.90                              |
| $\alpha$ , $\beta$ , $\gamma$ (°)                    | 90 90 90                                       |
| Resolution (Å)                                       | 41.77 - 1.17 (1.21 - 1.17) <sup>a</sup>        |
| <i>R</i> <sub>sym</sub> or <i>R</i> <sub>merge</sub> | 0.052 (0.659)                                  |
| <i>I</i> / $\sigma$ <i>I</i>                         | 16.16 (1.90)                                   |
| Completeness (%)                                     | 98.04 (87.61)                                  |
| Redundancy                                           | 5.8 (4.1)                                      |
| <b>Refinement</b>                                    |                                                |
| Resolution (Å)                                       | 41.77 - 1.17 (1.21 - 1.17)                     |
| No. reflections                                      | 74760 (6616)                                   |
| <i>R</i> <sub>work</sub> / <i>R</i> <sub>free</sub>  | 0.148 (0.225) / 0.180 (0.264)                  |
| No. atoms                                            |                                                |
| Protein                                              | 1837                                           |
| Ligand/ion                                           | 26                                             |
| Water                                                | 347                                            |
| <i>B</i> -factors                                    |                                                |
| Protein                                              | 15.7                                           |
| Ligand/ion                                           | 12.8                                           |
| Water                                                | 30.9                                           |
| R.m.s. deviations                                    |                                                |
| Bond lengths (Å)                                     | 0.010                                          |
| Bond angles (°)                                      | 1.10                                           |

<sup>a</sup> Numbers in brackets correspond to values in the highest resolution shell.

**Table S1f** Data collection and refinement statistics (molecular replacement) for TrpR-M42F-T44L-T81M-N87G-S88Y with ligand IAA

| TrpR-M42F-T44L-T81M-N87G-S88Y IAA: 6ELB              |                                                |
|------------------------------------------------------|------------------------------------------------|
| <b>Data collection</b>                               |                                                |
| Space group                                          | P 2 <sub>1</sub> 2 <sub>1</sub> 2 <sub>1</sub> |
| Cell dimensions                                      |                                                |
| <i>a</i> , <i>b</i> , <i>c</i> (Å)                   | 55.09 63.31 65.05                              |
| $\alpha$ , $\beta$ , $\gamma$ (°)                    | 90 90 90                                       |
| Resolution (Å)                                       | 45.37 - 1.44 (1.49 - 1.44) <sup>a</sup>        |
| <i>R</i> <sub>sym</sub> or <i>R</i> <sub>merge</sub> | 0.048 (1.086)                                  |
| <i>I</i> / $\sigma$ <i>I</i>                         | 19.27 (1.37)                                   |
| Completeness (%)                                     | 98.25 (93.32)                                  |
| Redundancy                                           | 7.2 (6.9)                                      |
| <b>Refinement</b>                                    |                                                |
| Resolution (Å)                                       | 45.37 - 1.44 (1.49 - 1.44)                     |
| No. reflections                                      | 41354 (3869)                                   |
| <i>R</i> <sub>work</sub> / <i>R</i> <sub>free</sub>  | 0.154 (0.227) / 0.193 (0.316)                  |
| No. atoms                                            |                                                |
| Protein                                              | 1771                                           |
| Ligand/ion                                           | 26                                             |
| Water                                                | 309                                            |
| <i>B</i> -factors                                    |                                                |
| Protein                                              | 24.3                                           |
| Ligand/ion                                           | 18.7                                           |
| Water                                                | 36.4                                           |
| R.m.s. deviations                                    |                                                |
| Bond lengths (Å)                                     | 0.006                                          |
| Bond angles (°)                                      | 0.82                                           |

<sup>a</sup> Numbers in brackets correspond to values in the highest resolution shell.



**Table S1g** Data collection and refinement statistics (molecular replacement) for TrpR-M42F-T44L-T81I-S88Y with ligand IAA

| TrpR- M42F-T44L-T81I-S88Y IAA: 6ELF    |                                                |
|----------------------------------------|------------------------------------------------|
| <b>Data collection</b>                 |                                                |
| Space group                            | P 2 <sub>1</sub> 2 <sub>1</sub> 2 <sub>1</sub> |
| Cell dimensions                        |                                                |
| $a, b, c$ (Å)                          | 54.96 63.41 64.82                              |
| $\alpha, \beta, \gamma$ (°)            | 90 90 90                                       |
| Resolution (Å)                         | 31.70 - 1.83 (1.90 - 1.83) <sup>a</sup>        |
| $R_{\text{sym}}$ or $R_{\text{merge}}$ | 0.094 (1.985)                                  |
| $I / \sigma I$                         | 18.08 (1.22)                                   |
| Completeness (%)                       | 99.50 (96.29)                                  |
| Redundancy                             | 12.5 (11.2)                                    |
| <b>Refinement</b>                      |                                                |
| Resolution (Å)                         | 31.70 - 1.83 (1.90 - 1.83)                     |
| No. reflections                        | 20416 (1945)                                   |
| $R_{\text{work}} / R_{\text{free}}$    | 0.177 (0.409) / 0.217 (0.421)                  |
| No. atoms                              |                                                |
| Protein                                | 1701                                           |
| Ligand/ion                             | 26                                             |
| Water                                  | 155                                            |
| <i>B</i> -factors                      |                                                |
| Protein                                | 35.6                                           |
| Ligand/ion                             | 31.3                                           |
| Water                                  | 42.4                                           |
| R.m.s. deviations                      |                                                |
| Bond lengths (Å)                       | 0.013                                          |
| Bond angles (°)                        | 1.20                                           |

<sup>a</sup> Numbers in brackets correspond to values in the highest resolution shell.

**Table S1h** Data collection and refinement statistics (molecular replacement) for TrpR-M42F-T44L-T81I-S88Y with ligand IAN

| TrpR- M42F-T44L-T81I-S88Y IAN: 6ELG                  |                                                |
|------------------------------------------------------|------------------------------------------------|
| <b>Data collection</b>                               |                                                |
| Space group                                          | P 2 <sub>1</sub> 2 <sub>1</sub> 2 <sub>1</sub> |
| Cell dimensions                                      |                                                |
| <i>a</i> , <i>b</i> , <i>c</i> (Å)                   | 55.01 63.47 65.36                              |
| $\alpha$ , $\beta$ , $\gamma$ (°)                    | 90 90 90                                       |
| Resolution (Å)                                       | 42.09 - 1.38 (1.43 - 1.38) <sup>a</sup>        |
| <i>R</i> <sub>sym</sub> or <i>R</i> <sub>merge</sub> | 0.063 (0.772)                                  |
| <i>I</i> / $\sigma$ <i>I</i>                         | 16.65 (1.83)                                   |
| Completeness (%)                                     | 99.55 (96.20)                                  |
| Redundancy                                           | 6.3 (5.8)                                      |
| <b>Refinement</b>                                    |                                                |
| Resolution (Å)                                       | 42.09 - 1.38 (1.43 - 1.38)                     |
| No. reflections                                      | 47907 (4557)                                   |
| <i>R</i> <sub>work</sub> / <i>R</i> <sub>free</sub>  | 0.143 (0.239) / 0.177 (0.295)                  |
| No. atoms                                            |                                                |
| Protein                                              | 1790                                           |
| Ligand/ion                                           | 24                                             |
| Water                                                | 387                                            |
| <i>B</i> -factors                                    |                                                |
| Protein                                              | 16.8                                           |
| Ligand/ion                                           | 12.8                                           |
| Water                                                | 29.8                                           |
| R.m.s. deviations                                    |                                                |
| Bond lengths (Å)                                     | 0.010                                          |
| Bond angles (°)                                      | 0.99                                           |

<sup>a</sup> Numbers in brackets correspond to values in the highest resolution shell.

Table S2. Flow cytometry statistics

| Sample description  | Y Param                          | Gate  | Mean Y | Median Y | Gate2         | % Hist | Sample # | Sample replicate | Dilution | Conc [fM]   | FRET-ratio meanY | Conc [fM]   | % Hist | Conc [fM]   | FRET-ratio meanY | Conc [fM]   | FRET-ratio % |
|---------------------|----------------------------------|-------|--------|----------|---------------|--------|----------|------------------|----------|-------------|------------------|-------------|--------|-------------|------------------|-------------|--------------|
| Sample 189_H2O      | (FL10-Log_Height/FL9-Log_Height) | Total | 0      | 0        | FRET-RESPONSE | 0      | 189      | x                | 0        | 0           | 0                | 0           | 0      | 0           | 0                | 0           | 0.00         |
| Sample 190_AQUA     | (FL10-Log_Height/FL9-Log_Height) | Total | 290.88 | 295.52   | FRET-RESPONSE | 66.67  | 190      | x                | 0        | 0           | 290.88           | 0           | 66.67  | 0           | 0                | 0           | 2.94         |
| Sample 191_NEON     | (FL10-Log_Height/FL9-Log_Height) | Total | 394.34 | 338.59   | FRET-RESPONSE | 4.18   | 191      | x                | 0        | 0           | 394.34           | 0           | 4.18   | 0           | 0                | 0           | 0.18         |
| Sample 192_GFP      | (FL10-Log_Height/FL9-Log_Height) | Total | 987.72 | 666.08   | FRET-RESPONSE | 17.03  | 192      | x                | 0        | 0           | 987.72           | 0           | 17.03  | 0           | 0                | 0           | 0.75         |
| Sample 193_AUX_0.0  | (FL10-Log_Height/FL9-Log_Height) | Total | 312.95 | 309.17   | FRET-RESPONSE | 21.38  | 193      | x                | 0        | 0           | 312.95           | 0           | 21.38  | 0           | 0                | 0           | 0.94         |
| Sample 194_AUX_a.1  | (FL10-Log_Height/FL9-Log_Height) | Total | 749.86 | 636.68   | FRET-RESPONSE | 27.26  | 194      | x                | 1        | 0.01        | 749.86           | 0.01        | 27.26  | 0.01        | 0.01             | 0.01        | 1.20         |
| Sample 195_AUX_a.2  | (FL10-Log_Height/FL9-Log_Height) | Total | 670.34 | 608.57   | FRET-RESPONSE | 28.34  | 195      | a                | 2        | 0.0025      | 670.34           | 0.0025      | 28.34  | 0.0025      | 2.11             | 0.0025      | 1.25         |
| Sample 196_AUX_a.3  | (FL10-Log_Height/FL9-Log_Height) | Total | 597.79 | 556.03   | FRET-RESPONSE | 26.88  | 196      | a                | 3        | 0.000625    | 597.79           | 0.000625    | 26.88  | 0.000625    | 1.88             | 0.000625    | 1.18         |
| Sample 197_AUX_a.4  | (FL10-Log_Height/FL9-Log_Height) | Total | 452.96 | 424.08   | FRET-RESPONSE | 25.66  | 197      | a                | 4        | 0.00015625  | 452.96           | 0.00015625  | 25.66  | 0.00015625  | 1.42             | 0.00015625  | 1.13         |
| Sample 198_AUX_a.5  | (FL10-Log_Height/FL9-Log_Height) | Total | 377.88 | 370.36   | FRET-RESPONSE | 23.66  | 198      | a                | 5        | 3.90625E-05 | 377.88           | 3.90625E-05 | 23.66  | 3.90625E-05 | 1.19             | 3.90625E-05 | 1.04         |
| Sample 199_AUX_a.6  | (FL10-Log_Height/FL9-Log_Height) | Total | 340.12 | 338.39   | FRET-RESPONSE | 23.64  | 199      | a                | 6        | 9.76563E-06 | 340.12           | 9.76563E-06 | 23.64  | 9.76563E-06 | 1.07             | 9.76563E-06 | 1.04         |
| Sample 200_AUX_a.7  | (FL10-Log_Height/FL9-Log_Height) | Total | 330.7  | 323.45   | FRET-RESPONSE | 23.39  | 200      | a                | 7        | 2.44141E-06 | 330.7            | 2.44141E-06 | 23.39  | 2.44141E-06 | 1.04             | 2.44141E-06 | 1.03         |
| Sample 201_AUX_a.8  | (FL10-Log_Height/FL9-Log_Height) | Total | 325.35 | 323.45   | FRET-RESPONSE | 23.35  | 201      | a                | 8        | 6.10352E-07 | 325.35           | 6.10352E-07 | 23.35  | 6.10352E-07 | 1.02             | 6.10352E-07 | 1.00         |
| Sample 202_AUX_a.9  | (FL10-Log_Height/FL9-Log_Height) | Total | 320.86 | 323.45   | FRET-RESPONSE | 22.72  | 202      | a                | 9        | 1.52588E-07 | 320.86           | 1.52588E-07 | 22.72  | 1.52588E-07 | 1.01             | 1.52588E-07 | 1.00         |
| Sample 203_AUX_a.10 | (FL10-Log_Height/FL9-Log_Height) | Total | 326.59 | 323.45   | FRET-RESPONSE | 22.69  | 203      | a                | 10       | 3.8147E-08  | 326.59           | 3.8147E-08  | 22.69  | 3.8147E-08  | 1.03             | 3.8147E-08  | 1.00         |
| Sample 204_AUX_a.11 | (FL10-Log_Height/FL9-Log_Height) | Total | 321.15 | 323.45   | FRET-RESPONSE | 24.06  | 204      | a                | 11       | 9.53674E-09 | 321.15           | 9.53674E-09 | 24.06  | 9.53674E-09 | 1.01             | 9.53674E-09 | 1.06         |
| Sample 205_AUX_a.12 | (FL10-Log_Height/FL9-Log_Height) | Total | 324.87 | 323.45   | FRET-RESPONSE | 22.95  | 205      | a                | 12       | 2.38419E-09 | 324.87           | 2.38419E-09 | 22.95  | 2.38419E-09 | 1.02             | 2.38419E-09 | 1.01         |
| Sample 206_AUX_b.1  | (FL10-Log_Height/FL9-Log_Height) | Total | 737.1  | 636.68   | FRET-RESPONSE | 28.63  | 206      | b                | 1        | 0.01        | 737.1            | 0.01        | 28.63  | 0.01        | 2.32             | 0.01        | 1.26         |
| Sample 207_AUX_b.2  | (FL10-Log_Height/FL9-Log_Height) | Total | 673.65 | 608.57   | FRET-RESPONSE | 27.49  | 207      | b                | 2        | 0.0025      | 673.65           | 0.0025      | 27.49  | 0.0025      | 2.12             | 0.0025      | 1.21         |
| Sample 208_AUX_b.3  | (FL10-Log_Height/FL9-Log_Height) | Total | 593.06 | 556.03   | FRET-RESPONSE | 28.33  | 208      | b                | 3        | 0.000625    | 593.06           | 0.000625    | 28.33  | 0.000625    | 1.86             | 0.000625    | 1.25         |
| Sample 209_AUX_b.4  | (FL10-Log_Height/FL9-Log_Height) | Total | 461.27 | 443.67   | FRET-RESPONSE | 26.26  | 209      | b                | 4        | 0.00015625  | 461.27           | 0.00015625  | 26.26  | 0.00015625  | 1.48             | 0.00015625  | 1.16         |
| Sample 210_AUX_b.5  | (FL10-Log_Height/FL9-Log_Height) | Total | 376.13 | 370.36   | FRET-RESPONSE | 24.93  | 210      | b                | 5        | 3.90625E-05 | 376.13           | 3.90625E-05 | 24.93  | 3.90625E-05 | 1.18             | 3.90625E-05 | 1.10         |
| Sample 211_AUX_b.6  | (FL10-Log_Height/FL9-Log_Height) | Total | 343.42 | 338.39   | FRET-RESPONSE | 23.94  | 211      | b                | 6        | 9.76563E-06 | 343.42           | 9.76563E-06 | 23.94  | 9.76563E-06 | 1.08             | 9.76563E-06 | 1.06         |
| Sample 212_AUX_b.7  | (FL10-Log_Height/FL9-Log_Height) | Total | 327.81 | 323.45   | FRET-RESPONSE | 23.5   | 212      | b                | 7        | 2.44141E-06 | 327.81           | 2.44141E-06 | 23.5   | 2.44141E-06 | 1.03             | 2.44141E-06 | 1.04         |
| Sample 213_AUX_b.8  | (FL10-Log_Height/FL9-Log_Height) | Total | 320.02 | 323.45   | FRET-RESPONSE | 22.93  | 213      | b                | 8        | 6.10352E-07 | 320.02           | 6.10352E-07 | 22.93  | 6.10352E-07 | 1.01             | 6.10352E-07 | 1.01         |
| Sample 214_AUX_b.9  | (FL10-Log_Height/FL9-Log_Height) | Total | 320.66 | 323.45   | FRET-RESPONSE | 22.96  | 214      | b                | 9        | 1.52588E-07 | 320.66           | 1.52588E-07 | 22.96  | 1.52588E-07 | 1.01             | 1.52588E-07 | 1.01         |
| Sample 215_AUX_b.10 | (FL10-Log_Height/FL9-Log_Height) | Total | 322.21 | 323.45   | FRET-RESPONSE | 23.1   | 215      | b                | 10       | 3.8147E-08  | 322.21           | 3.8147E-08  | 23.1   | 3.8147E-08  | 1.01             | 3.8147E-08  | 1.02         |
| Sample 216_AUX_b.11 | (FL10-Log_Height/FL9-Log_Height) | Total | 321.47 | 323.45   | FRET-RESPONSE | 23.33  | 216      | b                | 11       | 9.53674E-09 | 321.47           | 9.53674E-09 | 23.33  | 9.53674E-09 | 1.01             | 9.53674E-09 | 1.03         |
| Sample 217_AUX_b.12 | (FL10-Log_Height/FL9-Log_Height) | Total | 323.82 | 323.45   | FRET-RESPONSE | 23.43  | 217      | b                | 12       | 2.38419E-09 | 323.82           | 2.38419E-09 | 23.43  | 2.38419E-09 | 1.02             | 2.38419E-09 | 1.03         |
| Sample 218_AUX_c.1  | (FL10-Log_Height/FL9-Log_Height) | Total | 731.46 | 636.68   | FRET-RESPONSE | 28.08  | 218      | c                | 1        | 0.01        | 731.46           | 0.01        | 28.08  | 0.01        | 2.30             | 0.01        | 1.24         |
| Sample 219_AUX_c.2  | (FL10-Log_Height/FL9-Log_Height) | Total | 669.51 | 608.57   | FRET-RESPONSE | 28.21  | 219      | c                | 2        | 0.0025      | 669.51           | 0.0025      | 28.21  | 0.0025      | 2.10             | 0.0025      | 1.24         |
| Sample 220_AUX_c.3  | (FL10-Log_Height/FL9-Log_Height) | Total | 599.75 | 556.03   | FRET-RESPONSE | 28.05  | 220      | c                | 3        | 0.000625    | 599.75           | 0.000625    | 28.05  | 0.000625    | 1.89             | 0.000625    | 1.24         |
| Sample 221_AUX_c.4  | (FL10-Log_Height/FL9-Log_Height) | Total | 473.14 | 443.67   | FRET-RESPONSE | 26.17  | 221      | c                | 4        | 0.00015625  | 473.14           | 0.00015625  | 26.17  | 0.00015625  | 1.49             | 0.00015625  | 1.15         |
| Sample 222_AUX_c.5  | (FL10-Log_Height/FL9-Log_Height) | Total | 382.84 | 370.36   | FRET-RESPONSE | 25.36  | 222      | c                | 5        | 3.90625E-05 | 382.84           | 3.90625E-05 | 25.36  | 3.90625E-05 | 1.20             | 3.90625E-05 | 1.12         |
| Sample 223_AUX_c.6  | (FL10-Log_Height/FL9-Log_Height) | Total | 341.03 | 338.39   | FRET-RESPONSE | 24.15  | 223      | c                | 6        | 9.76563E-06 | 341.03           | 9.76563E-06 | 24.15  | 9.76563E-06 | 1.07             | 9.76563E-06 | 1.06         |
| Sample 224_AUX_c.7  | (FL10-Log_Height/FL9-Log_Height) | Total | 326.56 | 323.45   | FRET-RESPONSE | 23.68  | 224      | c                | 7        | 2.44141E-06 | 326.56           | 2.44141E-06 | 23.68  | 2.44141E-06 | 1.03             | 2.44141E-06 | 1.04         |
| Sample 225_AUX_c.8  | (FL10-Log_Height/FL9-Log_Height) | Total | 318.71 | 309.17   | FRET-RESPONSE | 23.02  | 225      | c                | 8        | 6.10352E-07 | 318.71           | 6.10352E-07 | 23.02  | 6.10352E-07 | 1.00             | 6.10352E-07 | 1.01         |
| Sample 226_AUX_c.9  | (FL10-Log_Height/FL9-Log_Height) | Total | 319.9  | 323.45   | FRET-RESPONSE | 23.54  | 226      | c                | 9        | 1.52588E-07 | 319.9            | 1.52588E-07 | 23.54  | 1.52588E-07 | 1.01             | 1.52588E-07 | 1.04         |
| Sample 227_AUX_c.10 | (FL10-Log_Height/FL9-Log_Height) | Total | 322.59 | 323.45   | FRET-RESPONSE | 23.83  | 227      | c                | 10       | 3.8147E-08  | 322.59           | 3.8147E-08  | 23.83  | 3.8147E-08  | 1.01             | 3.8147E-08  | 1.05         |
| Sample 228_AUX_c.11 | (FL10-Log_Height/FL9-Log_Height) | Total | 318.1  | 309.17   | FRET-RESPONSE | 23.82  | 228      | c                | 11       | 9.53674E-09 | 318.1            | 9.53674E-09 | 23.82  | 9.53674E-09 | 1.00             | 9.53674E-09 | 1.05         |
| Sample 229_AUX_c.12 | (FL10-Log_Height/FL9-Log_Height) | Total | 319.87 | 309.17   | FRET-RESPONSE | 23.6   | 229      | c                | 12       | 2.38419E-09 | 319.87           | 2.38419E-09 | 23.6   | 2.38419E-09 | 1.01             | 2.38419E-09 | 1.04         |

min

</
